# Supplementary material for: Microfluidic-Based Measurement Method of Red Blood Cell Aggregation under Hematocrit Variations
Source: Sensors (Basel). 2017 Sep 6;17(9):2037. doi: 10.3390/s17092037 (PMC5620946; doi:10.3390/s17092037)
Supplement: Supplementary file 1 [file sensors-17-02037-s001.pdf]

# Supplementary Materials

## Microfluidic-Based Measurement Method of Red Blood Cell Aggregation under Hematocrit Variations

Yang Jun Kang

Department of Mechanical Engineering, Chosun University, 309 Pilmun-daero, Dong-gu, Gwangju 61452, Korea; yjkang2011@chosun.ac.kr; Tel.: +82-62-230-7052; Fax: +82-62-230-7055

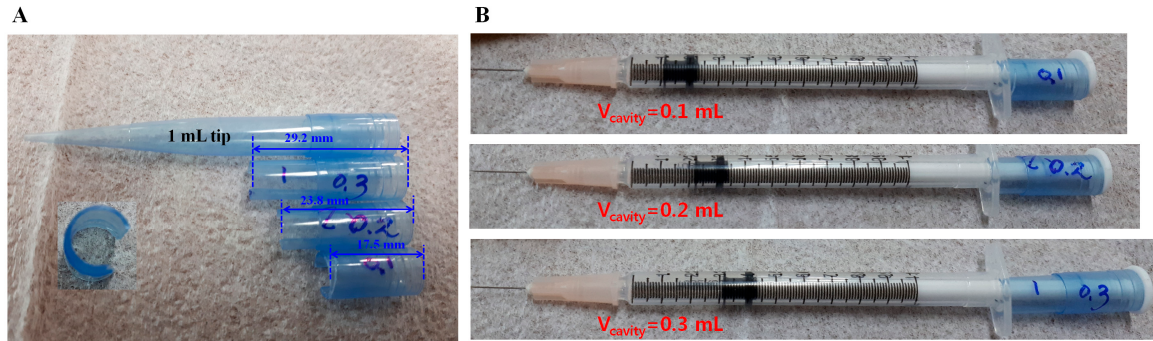

**Figure S1.** (A) Preparation of three spacers to secure cavity volume ( $V_{\text{cavity}}$ ). The spacer for the corresponding cavity volume was cut at (a)  $L=17.5$  mm ( $V_{\text{cavity}}=0.1$  mL), (b)  $L=23.8$  mm ( $V_{\text{cavity}}=0.2$  mL), and (c)  $L=29.2$  mm ( $V_{\text{cavity}}=0.3$  mL) using a 1 mL pipette tip. The round wall of a spacer was partially cut. (B) A disposable suction pump with respect to cavity volume ( $V_{\text{cavity}}$ ) ( $V_{\text{cavity}}=0.1$  mL, 0.2 mL, and 0.3 mL).

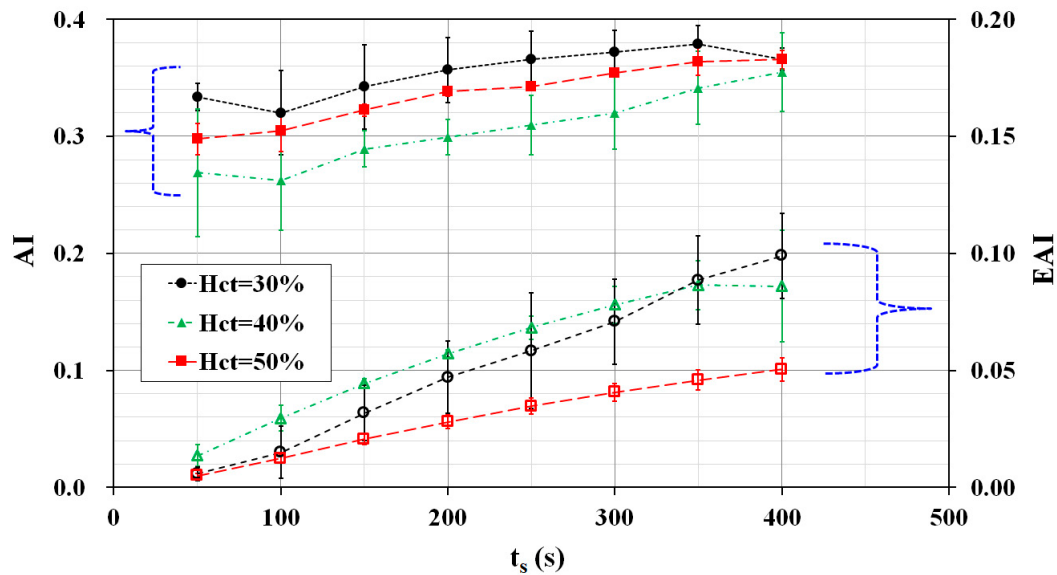

**Figure S2.** Variations of AI and EAI with respect to hematocrit ( $H_{\text{ct}}$ ) and specific duration of time ( $t_s$ ).

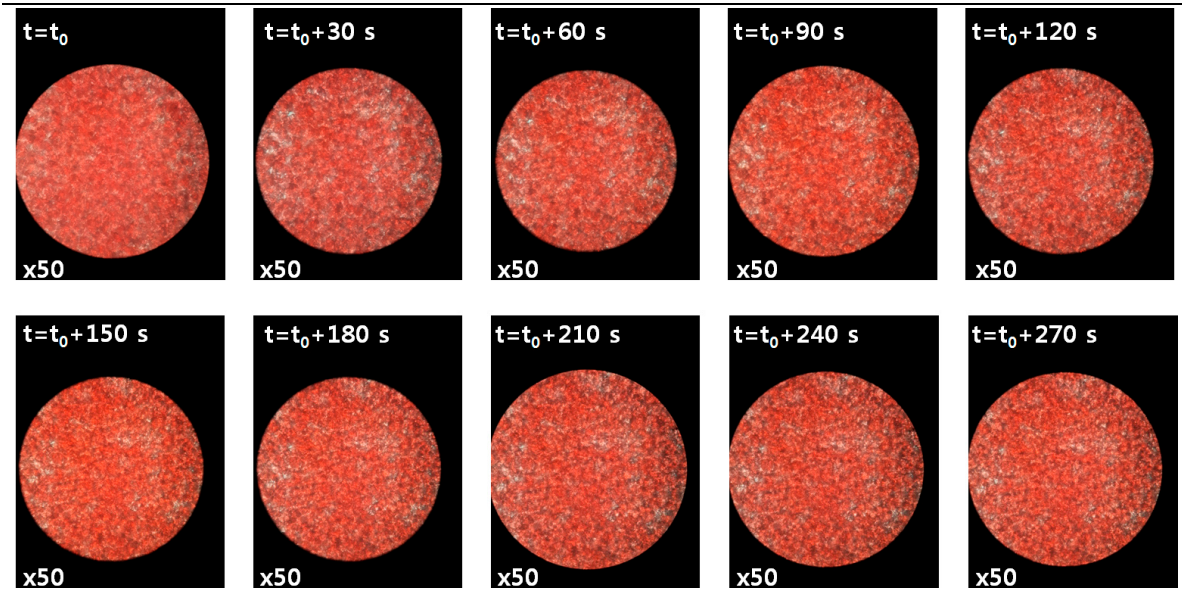

**Figure S3.** Sequential snapshot images captured with smartphone-based camera at intervals of 30 s after clamping the tube with pinch valve. Here, 50x objective lens (NA=0.5) was applied to monitor RBCs behaviors in details. RBCs-depleted regions (i.e., plasma) were expanded with an elapse of time. Since RBCs were distributed as multiple layers in depth direction, it is impossible to see rouleaux formation clearly.

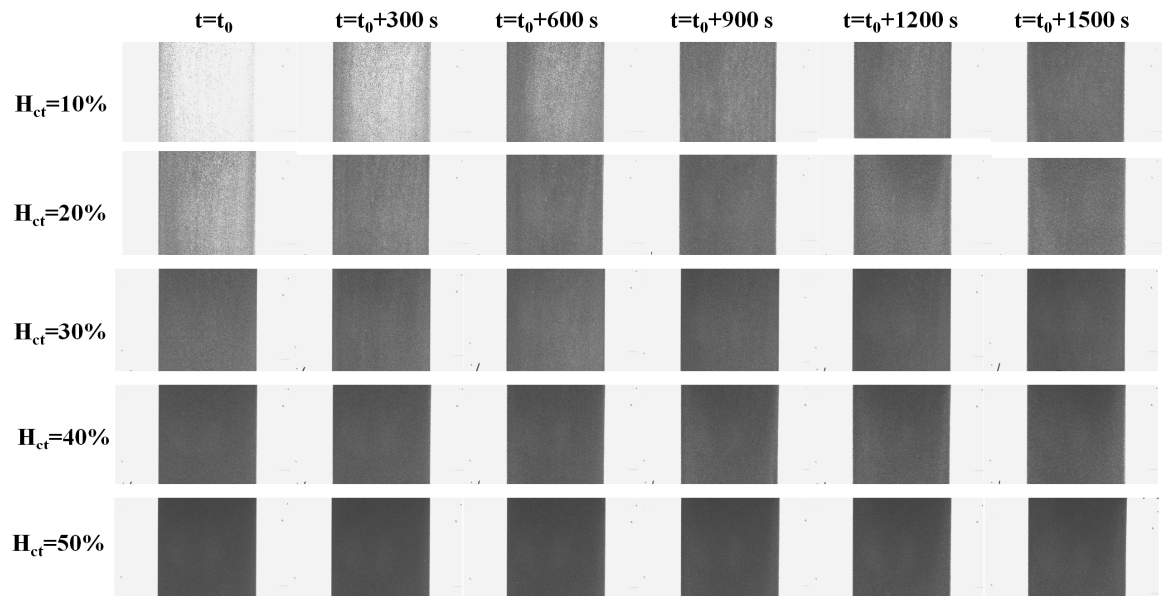

**Figure S4.** Sequential microscopic images obtained at intervals of 300 s with respect to hematocrit ( $H_{ct}$ ) ( $H_{ct}=10\%$ ,  $20\%$ ,  $30\%$ ,  $40\%$ , and  $50\%$ ). From these sequential images, image intensity was decreased over time. This results indicates that hematocrit variations in the conical pipette tip cause to decrease image intensity over time.
